# Supplementary material for: Topical Cyclosporine in Oral Lichen Planus—A Series of 21 Open-Label, Biphasic, Single-Patient Observations
Source: MDPI journal article supplement (doi:10.3390/jcm10225454), 2021-11-22
Supplement: s1 [file s1]

## DLQI (Dermatology Life Quality Index) questionnaire

### DERMATOLOGY LIFE QUALITY INDEX

Hospital No:

Date:

Name:

Score:

Address:

Diagnosis:

DLQI

**The aim of this questionnaire is to measure how much your skin problem has affected your life over the last week. Please tick ⇒ one box for each question.**

- |     |                                                                                                                                                     |                                     |                                       |
|-----|-----------------------------------------------------------------------------------------------------------------------------------------------------|-------------------------------------|---------------------------------------|
| 1.  | Over the last week, how <b>itchy, sore, painful</b> or <b>stinging</b> has your skin been?                                                          | Very much <input type="checkbox"/>  |                                       |
|     |                                                                                                                                                     | A lot <input type="checkbox"/>      |                                       |
|     |                                                                                                                                                     | A little <input type="checkbox"/>   |                                       |
|     |                                                                                                                                                     | Not at all <input type="checkbox"/> |                                       |
| 2.  | Over the last week, how <b>embarrassed</b> or <b>self conscious</b> have you been because of your skin?                                             | Very much <input type="checkbox"/>  |                                       |
|     |                                                                                                                                                     | A lot <input type="checkbox"/>      |                                       |
|     |                                                                                                                                                     | A little <input type="checkbox"/>   |                                       |
|     |                                                                                                                                                     | Not at all <input type="checkbox"/> |                                       |
| 3.  | Over the last week, how much has your skin interfered with you going <b>shopping</b> or looking after your <b>home</b> or <b>garden</b> ?           | Very much <input type="checkbox"/>  |                                       |
|     |                                                                                                                                                     | A lot <input type="checkbox"/>      |                                       |
|     |                                                                                                                                                     | A little <input type="checkbox"/>   |                                       |
|     |                                                                                                                                                     | Not at all <input type="checkbox"/> | Not relevant <input type="checkbox"/> |
| 4.  | Over the last week, how much has your skin influenced the <b>clothes</b> you wear?                                                                  | Very much <input type="checkbox"/>  |                                       |
|     |                                                                                                                                                     | A lot <input type="checkbox"/>      |                                       |
|     |                                                                                                                                                     | A little <input type="checkbox"/>   |                                       |
|     |                                                                                                                                                     | Not at all <input type="checkbox"/> | Not relevant <input type="checkbox"/> |
| 5.  | Over the last week, how much has your skin affected any <b>social</b> or <b>leisure</b> activities?                                                 | Very much <input type="checkbox"/>  |                                       |
|     |                                                                                                                                                     | A lot <input type="checkbox"/>      |                                       |
|     |                                                                                                                                                     | A little <input type="checkbox"/>   |                                       |
|     |                                                                                                                                                     | Not at all <input type="checkbox"/> | Not relevant <input type="checkbox"/> |
| 6.  | Over the last week, how much has your skin made it difficult for you to do any <b>sport</b> ?                                                       | Very much <input type="checkbox"/>  |                                       |
|     |                                                                                                                                                     | A lot <input type="checkbox"/>      |                                       |
|     |                                                                                                                                                     | A little <input type="checkbox"/>   |                                       |
|     |                                                                                                                                                     | Not at all <input type="checkbox"/> | Not relevant <input type="checkbox"/> |
| 7.  | Over the last week, has your skin prevented you from <b>working</b> or <b>studying</b> ?                                                            | Yes <input type="checkbox"/>        |                                       |
|     |                                                                                                                                                     | No <input type="checkbox"/>         | Not relevant <input type="checkbox"/> |
|     | If "No", over the last week how much has your skin been a problem at <b>work</b> or <b>studying</b> ?                                               | A lot <input type="checkbox"/>      |                                       |
|     |                                                                                                                                                     | A little <input type="checkbox"/>   |                                       |
|     |                                                                                                                                                     | Not at all <input type="checkbox"/> |                                       |
| 8.  | Over the last week, how much has your skin created problems with your <b>partner</b> or any of your <b>close friends</b> or <b>relatives</b> ?      | Very much <input type="checkbox"/>  |                                       |
|     |                                                                                                                                                     | A lot <input type="checkbox"/>      |                                       |
|     |                                                                                                                                                     | A little <input type="checkbox"/>   |                                       |
|     |                                                                                                                                                     | Not at all <input type="checkbox"/> | Not relevant <input type="checkbox"/> |
| 9.  | Over the last week, how much has your skin caused any <b>sexual</b> <b>difficulties</b> ?                                                           | Very much <input type="checkbox"/>  |                                       |
|     |                                                                                                                                                     | A lot <input type="checkbox"/>      |                                       |
|     |                                                                                                                                                     | A little <input type="checkbox"/>   |                                       |
|     |                                                                                                                                                     | Not at all <input type="checkbox"/> | Not relevant <input type="checkbox"/> |
| 10. | Over the last week, how much of a problem has the <b>treatment</b> for your skin been, for example by making your home messy, or by taking up time? | Very much <input type="checkbox"/>  |                                       |
|     |                                                                                                                                                     | A lot <input type="checkbox"/>      |                                       |
|     |                                                                                                                                                     | A little <input type="checkbox"/>   |                                       |
|     |                                                                                                                                                     | Not at all <input type="checkbox"/> | Not relevant <input type="checkbox"/> |

**Please check you have answered EVERY question. Thank you.**

©AY Finlay, GK Khan, April 1992 www.dermatology.org.uk, this must not be copied without the permission of the authors.

**Table S1.** Age range, clinical picture and previous therapies of individual patients at baseline.

| No. | Age (years) | Sex | Subtype OLP | cutaneous LP | genital LP | TCS/SCS  |
|-----|-------------|-----|-------------|--------------|------------|----------|
| 1   | 52          | f   | erosive     | +            | -          | TCS      |
| 2   | 66          | f   | erosive     | -            | +          | TCS      |
| 3   | 58          | f   | erosive     | -            | -          | TCS      |
| 4   | 51          | f   | atrophic    | -            | +          | TCS      |
| 5   | 56          | f   | erosive     | +            | -          | TCS      |
| 6   | 58          | m   | erosive     | -            | -          | TCS      |
| 7   | 73          | m   | reticular   | -            | -          | TCS      |
| 8   | 69          | f   | erosive     | -            | -          | TCS      |
| 9   | 40          | f   | erosive     | -            | -          | SCS, TCS |
| 10  | 58          | m   | erosive     | -            | -          | TCS      |
| 11  | 75          | f   | erosive     | -            | -          | TCS      |
| 12  | 59          | f   | atrophic    | -            | -          | TCS      |
| 13  | 58          | f   | erosive     | -            | -          | TCS      |
| 14  | 50          | f   | erosive     | -            | -          | TCS      |
| 15  | 41          | f   | erosive     | -            | -          | TCS      |
| 16  | 45          | m   | reticular   | -            | +          | TCS      |
| 17  | 79          | f   | erosive     | -            | -          | TCS      |
| 18  | 66          | f   | erosive     | -            | -          | TCS      |
| 19  | 52          | f   | erosive     | -            | -          | TCS      |
| 20  | 60          | m   | atrophic    | -            | -          | TCS      |
| 21  | 78          | f   | reticular   | -            | -          | TCS      |

Sex, age, clinical picture and previous therapies of individual patients at baseline. + yes, - no; No.: patient's number; LP: lichen planus; TCS: topical corticosteroid, SCS: systemic corticosteroid.

**Table S2.** Wilcoxon rank-sum test to analyse changes between responders and non-responders from T1 (withdrawal of CSA) to T2 (after four weeks without CSA) regarding VAS-, PGA- and DLQI-scores.

| Variable               | Overall ( <i>n</i> = 21) | Responder ( <i>n</i> = 16) | Non-responder ( <i>n</i> = 5) | <i>p</i> -value |
|------------------------|--------------------------|----------------------------|-------------------------------|-----------------|
|                        | No. (%)                  | No. (%)                    | No. (%)                       |                 |
|                        | median (Q1–Q3)           | median (Q1–Q3)             | median (Q1–Q3)                |                 |
| VAS Difference T1/T2   | 1.5 (0–2.5)              | 1.5 (0–2.8)                | 1 (0–2.5)                     | 0.90            |
| PGA Difference T1/T2   | 0.5 (0–1)                | 0 (0–1)                    | 1 (0.5–1)                     | 0.38            |
| DLQI Difference T1/T2* | 0.5 (-0.75–1)            | 0 (-0.5–1)                 | 1 (-0.5–1.5)                  | 0.75            |

Wilcoxon rank-sum test to analyse changes between responders and non-responders from T1 (withdrawal of CSA) to T2 (after four weeks without CSA) regarding VAS-, PGA- and DLQI-scores. No significant differences between the two groups were found. \* Evaluation of differences in DLQI-scores between T1 and T2 was based on 14 patients.

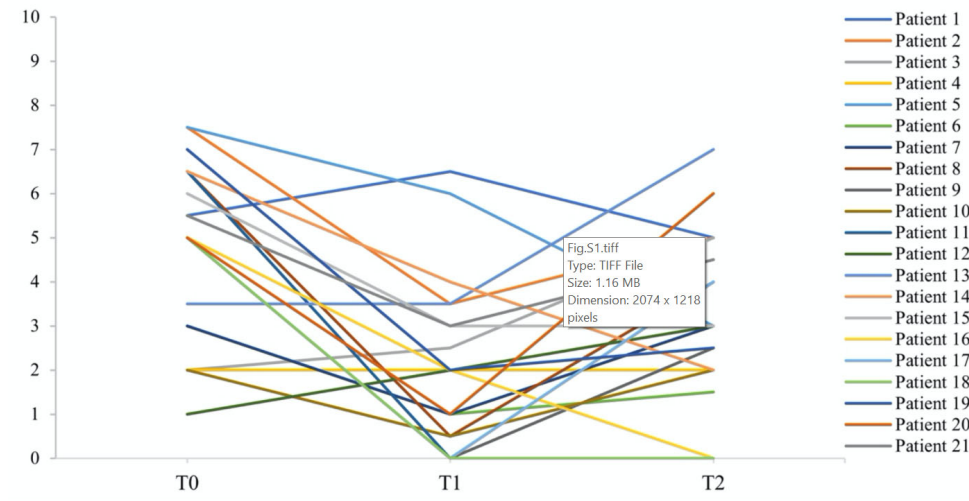

**Figure S1.** Line graphs showing courses of VAS-scores for each individual patient.
